# Supplementary material
Source: HighWire-hosted journal article supplement (https://erj.ersjournals.com/content/60/3/2102522)

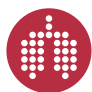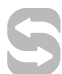

SHAREABLE PDF

# Pneumomediastinum in COVID-19: a phenotype of severe COVID-19 pneumonitis? The results of the UK POETIC survey

James Melhorn<sup>1,2,3</sup>, Andrew Achaiah<sup>3,4</sup>, Francesca M. Conway<sup>5</sup>, Elizabeth M.F. Thompson<sup>6</sup>, Erik W. Skjellberg<sup>7</sup>, Joseph Durrant<sup>7</sup>, Neda A. Hasan<sup>8</sup>, Yasser Madani<sup>8</sup>, Prasheena Naran<sup>9</sup>, Bavithra Vijayakumar<sup>5,10</sup>, Matthew J. Tate<sup>11</sup>, Gareth E. Trevelyan<sup>12</sup>, Irfan Zaki<sup>12</sup>, Catherine A. Doig<sup>13</sup>, Geraldine Lynch<sup>14</sup>, Gill Warwick<sup>15</sup>, Avinash Aujayeb<sup>16</sup>, Karl A. Jackson<sup>16</sup>, Hina Iftikhar<sup>17</sup>, Jonathan H. Noble<sup>17</sup>, Anthony Y.K.C. Ng<sup>18</sup>, Mark Nugent<sup>19</sup>, Philip J. Evans<sup>19</sup>, Robert A. Hastings<sup>19</sup>, Harry R. Bellenberg<sup>20</sup>, Hannah Lawrence<sup>21</sup>, Rachel L. Saville<sup>21</sup>, Nikolas T. Johl<sup>22</sup>, Adam N. Grey<sup>22</sup>, Huw C. Ellis<sup>23</sup>, Cheng Chen<sup>23</sup>, Thomas L. Jones<sup>24</sup>, Nadeem Maddekar<sup>25</sup>, Shahul Leyakathali Khan<sup>25</sup>, Ambreen Iqbal Muhammad<sup>26</sup>, Hakim Ghani<sup>26</sup>, Yadee Maung Maung Myint<sup>26</sup>, Cecillia Rafique<sup>27</sup>, Benjamin J. Pippard<sup>27</sup>, Benjamin R.H. Irving<sup>28</sup>, Fawad Ali<sup>29</sup>, Viola H. Asimba<sup>30</sup>, Aqeem Azam<sup>31</sup>, Eleanor C. Barton<sup>32</sup>, Malvika Bhatnagar<sup>33</sup>, Matthew P. Blackburn<sup>34</sup>, Kate J. Millington<sup>35</sup>, Nicholas J. Budhram<sup>35</sup>, Katherine L. Bunclark<sup>36</sup>, Toshit P. Sapkal<sup>36</sup>, Giles Dixon<sup>37</sup>, Andrew J.E. Harries<sup>38</sup>, Mohammad Ijaz<sup>39</sup>, Vijayalakshmi Karunanithi<sup>40</sup>, Samir Naik<sup>40</sup>, Malik Aamaz Khan<sup>41</sup>, Karishma Savlani<sup>41</sup>, Vimal Kumar<sup>42</sup>, Beatriz Lara Gallego<sup>43</sup>, Noor A. Mahdi<sup>44</sup>, Caitlin Morgan<sup>45</sup>, Neena Patel<sup>46</sup>, Elen W. Rowlands<sup>47</sup>, Matthew S. Steward<sup>48</sup>, Richard S. Thorley<sup>49</sup>, Rebecca L. Wollerton<sup>49</sup>, Sana Ullah<sup>50</sup>, David M. Smith<sup>51</sup>, Wojciech Lason<sup>1</sup>, Anthony J. Rostron<sup>51</sup>, Najib M. Rahman<sup>2,52</sup> and Rob J. Hallifax<sup>1,3</sup>

<sup>1</sup>Nuffield Dept of Medicine, John Radcliffe Hospital, University of Oxford, Oxford, UK. <sup>2</sup>National Institute for Health Research (NIHR) Oxford Biomedical Research Centre, Oxford, UK. <sup>3</sup>John Radcliffe Hospital, Oxford University Hospitals NHS Foundation Trust, Oxford, UK. <sup>4</sup>MRC Human Immunology Unit, Weatherall Institute of Molecular Medicine, University of Oxford, Oxford, UK. <sup>5</sup>Royal Brompton Hospital, National Heart and Lung Institute, London, UK. <sup>6</sup>St Bartholomew's Hospital, Barts Health NHS Trust, London, UK. <sup>7</sup>Newham University Hospital, Barts Health NHS Trust, London, UK. <sup>8</sup>Wexham Park Hospital, Frimley Health NHS Foundation Trust, Slough, UK. <sup>9</sup>Royal Free Hospital, Royal Free London NHS Foundation Trust, London, UK. <sup>10</sup>Chelsea and Westminster Hospital, National Heart and Lung Institute, Imperial College London, London, UK. <sup>11</sup>Queen Elizabeth University Hospital, NHS Greater Glasgow and Clyde, Glasgow, UK. <sup>12</sup>Royal Berkshire Hospital, Royal Berkshire NHS Foundation Trust, Reading, UK. <sup>13</sup>Southend University Hospital, Mid and South Essex NHS Foundation Trust, Southend, UK. <sup>14</sup>Prince of Wales Hospital, Cwm Taf Morgannwg University Health Board, Bridgend, UK. <sup>15</sup>The Royal Gwent Hospital, Aneurin Bevan Health Board, Newport, UK. <sup>16</sup>Northumbria Specialist Emergency Care Hospital, Northumbria Healthcare NHS Foundation Trust, Cramlington, UK. <sup>17</sup>Gloucester Royal Hospital, Gloucestershire Hospitals NHS Foundation Trust, Gloucester, UK. <sup>18</sup>Addenbrookes Hospital, Cambridge University Hospitals NHS Trust, Cambridge, UK. <sup>19</sup>Glangwilli General Hospital, Hywel Dda University Health Board, Carmarthen, UK. <sup>20</sup>Barnet General Hospital, Royal Free London NHS Foundation Trust, London, UK. <sup>21</sup>Royal Derby Hospital, University Hospitals of Derby and Burton NHS Foundation Trust, Derby, UK. <sup>22</sup>University Hospital of Wales, Cardiff and Vale University Health Board, Cardiff, UK. <sup>23</sup>Stoke Mandeville Hospital, Buckinghamshire Healthcare NHS Trust, Stoke Mandeville, UK. <sup>24</sup>Basingstoke and North Hampshire Hospital, Hampshire Hospitals NHS Foundation Trust, Basingstoke, UK. <sup>25</sup>Royal Stoke University Hospital, University Hospitals of North Midlands NHS Trust, Stoke, UK. <sup>26</sup>Watford General Hospital, West Hertfordshire Hospitals NHS Trust, Watford, UK. <sup>27</sup>University Hospital of North Tees, North Tees and Hartlepool NHS Foundation Trust, Hartlepool, UK. <sup>28</sup>Queen Alexandra Hospital, Portsmouth Hospitals University NHS Trust, Portsmouth, UK. <sup>29</sup>Bedford Hospital, Bedfordshire Hospitals NHS Foundation Trust, Bedford, UK. <sup>30</sup>Nottingham University Hospital, Nottingham University Hospitals NHS Trust, Nottingham, UK. <sup>31</sup>Royal Blackburn Teaching Hospital, East Lancashire Hospitals NHS Trust, Blackburn, UK. <sup>32</sup>The Grange University Hospital, Aneurin Bevan Health Board, Cwmbran, UK. <sup>33</sup>Darlington Memorial Hospital, County Durham and Darlington NHS Foundation Trust, Durham, UK. <sup>34</sup>Southport and Ormskirk District General Hospital, Southport and Ormskirk Hospital NHS Trust, Southport, UK. <sup>35</sup>Great Western Hospital, Great Western Hospital NHS Foundation Trust, Swindon, UK. <sup>36</sup>Norwich and Norfolk University Hospital, Norfolk and Norwich University Hospitals NHS Foundation Trust, Norwich, UK. <sup>37</sup>Royal United Hospitals Bath, The Royal United Hospitals Bath NHS Foundation Trust, Bath, UK. <sup>38</sup>Royal Glamorgan Hospital, Llantrisant, Cwm Taf University Health Board, Llantrisant, UK. <sup>39</sup>Wythenshawe Hospital, Manchester University NHS Foundation Trust, Manchester, UK. <sup>40</sup>The Princess Alexandra Hospital, The Princess Alexandra Hospital NHS Trust, Harlow, UK. <sup>41</sup>Luton and Dunstable University Hospital, Bedfordshire Hospitals NHS Foundation Trust, Luton, UK. <sup>42</sup>Kettering General Hospital, Kettering General Hospital NHS Foundation Trust, Kettering, UK. <sup>43</sup>University Hospital, University Hospitals Coventry and Warwickshire NHS Trust, Coventry, UK. <sup>44</sup>Lister Hospital, East and North Hertfordshire NHS Trust Stevenage, Stevenage, UK. <sup>45</sup>Musgrove Park Hospital, Somerset NHS Foundation Trust, Taunton, UK. <sup>46</sup>Whipps Cross Hospital, Barts Health NHS Trust, London, UK. <sup>47</sup>Neville Hall Hospital, Aneurin Bevan University Health Board, Abergavenny, UK. <sup>48</sup>Royal Devon and Exeter Hospital, Royal Devon and Exeter NHS Foundation Trust, Exeter, UK. <sup>49</sup>The Royal Cornwall Hospital, Royal Cornwall Hospitals NHS Trust, Truro, UK. <sup>50</sup>Ysbyty Glan Clwyd Hospital, Betsi Cadwaladr University Health Board, Rhyl, UK. <sup>51</sup>Integrated Critical Care Unit, Sunderland Royal Hospital, South Tyneside and Sunderland NHS Foundation Trust, Sunderland, UK. <sup>52</sup>Oxford Centre for Respiratory Medicine, Nuffield Dept of Medicine, University of Oxford, Oxford, UK.

Corresponding author: James Melhorn ([james.melhorn@ndm.ox.ac.uk](mailto:james.melhorn@ndm.ox.ac.uk))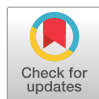

Shareable abstract (@ERSpublications)

**Roughly 0.6% of patients admitted with COVID-19 have pneumomediastinum identified. The finding is associated with severe COVID-19 and high mortality.** <https://bit.ly/3nXlaR5>

**Cite this article as:** Melhorn J, Achaiah A, Conway FM, *et al.* Pneumomediastinum in COVID-19: a phenotype of severe COVID-19 pneumonitis? The results of the UK POETIC survey. *Eur Respir J* 2022; 60: 2102522 [DOI: 10.1183/13993003.02522-2021].

This single-page version can be shared freely online.

Copyright ©The authors 2022.

This version is distributed under  
the terms of the Creative  
Commons Attribution Licence 4.0.

Received: 19 Sept 2021  
Accepted: 12 Jan 2022

## Abstract

**Background** There is an emerging understanding that coronavirus disease 2019 (COVID-19) is associated with increased incidence of pneumomediastinum (PTM). We aimed to determine its incidence among patients hospitalised with COVID-19 in the UK and describe factors associated with outcome.

**Methods** A structured survey of PTM and its incidence was conducted from September 2020 to February 2021. UK-wide participation was solicited *via* respiratory research networks. Identified patients had severe acute respiratory syndrome coronavirus 2 (SARS-CoV-2) infection and radiologically proven PTM. The primary outcomes were to determine incidence of PTM in COVID-19 and to investigate risk factors associated with patient mortality.

**Results** 377 cases of PTM in COVID-19 were identified from 58 484 inpatients with COVID-19 at 53 hospitals during the study period, giving an incidence of 0.64%. Overall 120-day mortality in COVID-19 PTM was 195 out of 377 (51.7%). PTM in COVID-19 was associated with high rates of mechanical ventilation. 172 out of 377 patients (45.6%) were mechanically ventilated at the point of diagnosis. Mechanical ventilation was the most important predictor of mortality in COVID-19 PTM at the time of diagnosis and thereafter ( $p<0.001$ ), along with increasing age ( $p<0.01$ ) and diabetes mellitus ( $p=0.08$ ). Switching patients from continuous positive airway pressure support to oxygen or high-flow nasal oxygen after the diagnosis of PTM was not associated with difference in mortality.

**Conclusions** PTM appears to be a marker of severe COVID-19 pneumonitis. The majority of patients in whom PTM was identified had not been mechanically ventilated at the point of diagnosis.

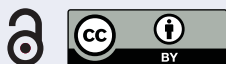

Supplement: inline-supplementary-material-2 [file inline-supplementary-material-2.pdf]
