# Supplementary material
Source: HighWire-hosted journal article supplement (https://erj.ersjournals.com/content/60/3/2102522)
Supplement: inline-supplementary-material-1 [file inline-supplementary-material-1.pdf]

# Pneumomediastinum in COVID-19: a phenotype of severe COVID-19 pneumonitis? The results of the United Kingdom (POETIC) survey

## Online Data Supplement (S1 – S9)

James Melhorn, Andrew Achaiah, Francesca M. Conway, Elizabeth M. F. Thompson, Erik W. Skjellberg, Joseph Durrant, Neda A. Hasan, Yasser Madani, Prasheena Naran, Bavithra Vijayakumar, Matthew J. Tate, Gareth E. Trevelyan, Irfan Zaki, Catherine A. Doig, Geraldine Lynch, Gill Warwick, Avinash Aujayeb, Karl A. Jackson, Hina Iftikhar, Jonathan H. Noble, Anthony Y. K. C. Ng, Mark Nugent, Philip J. Evans, Robert A. Hastings, Harry R. Bellenberg, Hannah Lawrence, Rachel L. Saville, Nikolas T. Johl, Adam N. Grey, Huw C. Ellis, Cheng Chen, Thomas L. Jones, Nadeem Maddekar, Shahul Leyakathali Khan, Ambreen Iqbal Muhammad, Hakim Ghani, Yadee Maung Maung Myint, Cecillia Rafique, Benjamin J. Pippard, Benjamin R. H. Irving, Fawad Ali, Viola H. Asimba, Aqeem Azam, Eleanor C. Barton, Malvika Bhatnagar, Matthew P. Blackburn, Kate J. Millington, Nicholas J. Budhram, Katherine L. Bunclark, Toshit P. Sapkal, Giles Dixon, Andrew J. E. Harries, Mohammad Ijaz, Vijayalakshmi Karunanithi, Samir Naik, Malik Aamaz Khan, Karishma Savlani, Vimal Kumar, Beatriz Lara Gallego, Noor A. Mahdi, Caitlin Morgan, Neena Patel, Elen W. Rowlands, Matthew S. Steward, Richard S. Thorley, Rebecca L. Wollerton, Sana Ullah, David M. Smith, Wojciech Lason, Anthony J Rostron, Najib M Rahman and Rob J Hallifax

## **Glossary of terms used**

ARDS = acute respiratory distress syndrome

BiPaP = conscious non-invasive bi-level positive airways pressure

COVID-19 = coronavirus 2019 infection

CPAP = continuous positive airways pressure

CT = computed tomography

CXR = chest radiograph

ECMO = extracorporeal membrane oxygenation

FiO<sub>2</sub> = fraction of inspired oxygen

IHD = ischaemic heart disease

HFNO = high flow nasal oxygen

LVSD = left ventricular systolic dysfunction

MV = invasively mechanically ventilated

PEEP = positive end expiratory pressure

PPV = positive pressure ventilation

PTM = pneumomediastinum

UK = United Kingdom

## **S1**

Prior to performing the current study we conducted a literature search of evidence on the subject. We searched MEDLINE and PubMed for original peer-reviewed cohort studies describing the incidence of pneumomediastinum in COVID-19 between March 2020 and June 2021. Search terms were “Pneumomediastinum” AND “COVID-19” OR “Barotrauma” AND “COVID-19” OR “Pneumothorax” AND “COVID-19”. Only reports published in English that included at least 5 cases and with estimates of a background population were included. Our search yielded 15 studies. These are detailed in table S1 below

**Table S1.** Previously published cohort studies with  $\geq 5$  cases of pneumomediastinum (PTM) and an identified denominator population.

| <b>Study and country of origin</b>   | <b>Single or Multicentre</b> | <b>Date Published</b> | <b>Number of cases of PTM</b> | <b>% cases diagnosed by thoracic CT</b> | <b>PTM with concurrent PTX</b> | <b>PTM with concurrent SCE</b> | <b>Number of denominator population</b> | <b>Denominator patient population</b> | <b>% cases in denominator PCR positive</b> |
|--------------------------------------|------------------------------|-----------------------|-------------------------------|-----------------------------------------|--------------------------------|--------------------------------|-----------------------------------------|---------------------------------------|--------------------------------------------|
| McGuinness et al (USA) <sup>1</sup>  | Single                       | Nov 2020              | 59                            | CXR diagnoses                           | Not stated                     | Not stated                     | 601                                     | Mechanically Ventilated               | 100%                                       |
| Kangas-Dick et al <sup>2</sup> (USA) | Single                       | Mar 2021              | 34                            | CXR diagnoses                           | 35.3%                          | Not stated                     | 346                                     | Mechanically Ventilated               | Unclear                                    |
| Housman et al <sup>3</sup> (USA)     | Single                       | Sep 2020              | 29                            | CXR diagnoses                           | 6.9 - 24%                      | 100%                           | 171                                     | Mechanically Ventilated               | 100%**                                     |
|                                      |                              |                       |                               |                                         |                                |                                |                                         |                                       |                                            |

|                                         |            |            |    |                  |            |            |      |                            |                       |
|-----------------------------------------|------------|------------|----|------------------|------------|------------|------|----------------------------|-----------------------|
| Wong et al <sup>4</sup><br>(USA)*       | Multi (2)  | Nov 2020   | 27 | CXR<br>diagnoses | 100%       | Not stated | 1822 | ARDS                       | Unclear               |
| Chopra et al <sup>5</sup><br>(USA)*     | Multi (4)  | May 2021   | 24 | Not stated       | 100%       | Not stated | 842  | Critical Care<br>(594 MV)  | 100%                  |
| Lemmers et<br>al <sup>6</sup> (Italy)   | Single     | Sep 2020   | 23 | CXR/CT           | 0%         | 100%       | 169  | ARDS                       | 100%                  |
| Rajdev et al <sup>7</sup><br>(USA)      | Single     | May 2021   | 21 | CXR/CT           | Not stated | Not stated | 353  | Oxygen / PPV<br>(121 MV)   | 100%                  |
| Brito et al <sup>8</sup><br>(Brazil)    | Single     | April 2021 | 21 | 100%             | 33%        | 90.5%      | 4087 | Hospital<br>Inpatients     | 100%**                |
| Martinelli et <sup>9</sup><br>al (UK)   | Multi (16) | Sep 2020   | 17 | CXR/CT           | 35.3%      | Not stated | 6574 | Hospital<br>Inpatients     | Clinical<br>Diagnoses |
| Belletti et al <sup>10</sup><br>(Italy) | Single     | Feb 2021   | 13 | 38.5%            | 53.8%      | Not stated | 116  | ARDS Criteria              | 100%                  |
| Cut et al <sup>11</sup><br>(Romania)    | Single     | Mar 2021   | 11 | 100%             | 72.7%      | 63.6%      | 1648 | Hospital<br>Inpatients     | Unclear               |
| Edwards et<br>al <sup>12</sup> (USA)    | Single     | Nov 2020   | 10 | CXR<br>diagnoses | 20%        | 90%        | 574  | Mechanically<br>Ventilated | 100%                  |
|                                         |            |            |    |                  |            |            |      |                            |                       |

|                                          |        |          |   |            |       |       |     |                          |         |
|------------------------------------------|--------|----------|---|------------|-------|-------|-----|--------------------------|---------|
| Talan et al <sup>13</sup><br>(Turkey)    | Single | Dec 2020 | 7 | 71.4%      | 57.1% | 57.1% | 161 | Critical Care<br>(96 MV) | Unclear |
| Udi et al <sup>14</sup><br>(Germany)     | Single | Aug 2020 | 5 | Not stated | 40%   | 40%   | 20  | ARDS                     | 100%    |
| Eperjesiova<br>et al <sup>15</sup> (USA) | Single | Jul 2020 | 5 | Not stated | 20%   | 80%   | 976 | Hospital<br>Inpatients   | Unclear |

Studies marked with an asterix (\*) focused on identifying COVID-19 pneumothorax (PTX) rather than COVID-19 pneumomediastinum (PTM) therefore all cases were PTM/PTX overlap with likely underestimation of incidence of COVID-19 PTM. Studies marked with (\*\*) describe 'confirmed COVID-19 infection' rather than SARS-CoV-2 PCR positivity.

## **S2**

Hospitals within the POETIC consortium were a representative mix of secondary and tertiary hospitals throughout the UK including those within areas of high index of multiple deprivation. They are listed below in alphabetical order:

Addenbrooke's Hospital, Cambridge  
Andover War Memorial Hospital  
Barnet Hospital  
Basingstoke and North Hampshire Hospital, Basingstoke  
Bedford Hospital  
Burnley General Teaching Hospital  
Chelsea and Westminster Hospital  
Glangwilli Hospital, Carmarthen  
Gloucester Royal Hospital  
Grange University Hospital, Newport  
Great Western Hospital, Swindon  
John Radcliffe Hospital  
Kettering General Hospital  
Lister Hospital, Stevenage  
Luton & Dunstable University Hospital, Luton  
Musgrove Park Hospital, Taunton  
Neville Hall Hospital, Abergavenny  
Newham University Hospital, London  
Norfolk and Norwich University Hospital, Norwich  
Northumbria Specialist Emergency Care Hospital  
Nottingham City Hospital  
Prince Philip Hospital, Llanelli  
Prince of Wales Hospital, Bridgend  
Princess Alexandra Hospital, Harlow  
Queen Alexandra Hospital, Portsmouth  
Queen Elizabeth University Hospital, Glasgow  
Royal Berkshire Hospital, Reading  
Royal Blackburn Teaching Hospital  
Royal Brompton Hospital, London  
Royal Cornwall Hospital, Truro  
Royal Derby Hospital, Derby  
Royal Devon & Exeter Hospital  
Royal Free Hospital, London  
Royal Glamorgan Hospital, Llantrisant  
Royal Gwent Hospital, Newport  
Royal Hampshire County Hospital, Winchester  
Royal London Hospital  
Royal Stoke University Hospital  
Royal United Hospitals, Bath  
Saint Bartholomew's Hospital, London  
Southend University Hospital  
Southport & Ormskirk District General Hospital  
Stoke Mandeville Hospital

Sunderland Royal Hospital  
University Hospital of Coventry and Warwickshire, Coventry  
University Hospital of North Durham  
University Hospital of North Tees, Stockton on Tees  
University Hospital of Wales, Cardiff  
Watford General Hospital  
Wexham Park Hospital, Wexham  
Whipps Cross Hospital, London  
Wythenshawe Hospital, Manchester  
Ysbyty Glan Clwyd, Rhyl

**S3**

**Table S3a.** Normalization of FiO2 received by patients. The assigned FiO2 we ascribed as received by patients on differing devices.<sup>16,17</sup>

| <b>Device</b>                     | <b>Flow Rate (L)</b> | <b>Estimated FiO2 received (%)</b> |
|-----------------------------------|----------------------|------------------------------------|
| Nasal cannulae                    | 1                    | 24                                 |
| Nasal cannulae                    | 2                    | 28                                 |
| Nasal cannulae                    | 3                    | 32                                 |
| Nasal cannulae                    | 4                    | 36                                 |
| Nasal cannulae                    | 5                    | 40                                 |
| Nasal cannulae                    | 6                    | 44                                 |
| Venturi Mask '28%'                | 4-6                  | 28                                 |
| Venturi Mask '35%'                | 8-10                 | 35                                 |
| Venturi Mask '40%'                | 10-12                | 40                                 |
| Venturi Mask '60%'                | 12-15                | 60                                 |
| Non Rebreathe Mask with Reservoir | 10                   | 62                                 |
| Non Rebreathe Mask with Reservoir | 11                   | 68                                 |
| Non Rebreathe Mask with Reservoir | 12                   | 72                                 |

|                                   |    |    |
|-----------------------------------|----|----|
| Non Rebreathe Mask with Reservoir | 13 | 78 |
| Non Rebreathe Mask with Reservoir | 14 | 84 |
| Non Rebreathe Mask with Reservoir | 15 | 90 |

**Table S3b.** The estimated PEEP received by patients on HFNO. This is extrapolated from expiratory pharyngeal readings for (Table 2, male subjects with their mouth closed) Groves and Tobin 2020.<sup>18</sup>

| Nasal Flow (L/min) | 0   | 10  | 20  | 30  | 40  | 50  | 60  | 70  | 80  |
|--------------------|-----|-----|-----|-----|-----|-----|-----|-----|-----|
| PEEP (cmH2O)       | 0.7 | 1.2 | 2.2 | 3.2 | 4.1 | 4.8 | 5.4 | 5.8 | 6.1 |

Domiciliary devices which entrain room air have been widely used during the pandemic. Such devices lack an oxygen blender and could result in an unreliable fraction of inspired oxygen (FiO<sub>2</sub>).<sup>19</sup> Using a series of “bench” studies the ARTP COVID Group<sup>20</sup> have identified that amount of oxygen delivered (FiO<sub>2</sub>) is influenced by the amount of CPAP pressure used by the patient. Ultimately increasing CPAP pressure exerts a dilutional effect on FiO<sub>2</sub>.<sup>20</sup> Aware that many subjects in our data set did not have documented FiO<sub>2</sub> values we derived an estimate of FiO<sub>2</sub> for patients based upon data from ARTP COVID Group bench studies.

Using data from the ARTP Guidance for Oxygen Utilisation document,<sup>20</sup> we replicated a graph representing FiO<sub>2</sub> for varying CPAP pressure across 4 commonly used domiciliary devices at a flow rate of 15 L/min; Resmed Lumis 100, Resmed Lumis 150, Breas Vivo2 and Resmed AS10. In the figure below mean values of FiO<sub>2</sub> for given CPAP pressures across these devices are plotted with a non-linear regression curve of best fit derived using GraphPad Prism version 9 (adapted from ARTP Guidance for Oxygen Utilisation, 2020).<sup>20</sup> Using the equation of this regression curve of mean values we estimated FiO<sub>2</sub> values for subjects in our dataset based on the assumption of 15L/min oxygen entrainment.

Figure S3c. Normalization of maximum PEEP and FiO<sub>2</sub> for patients on CPAP

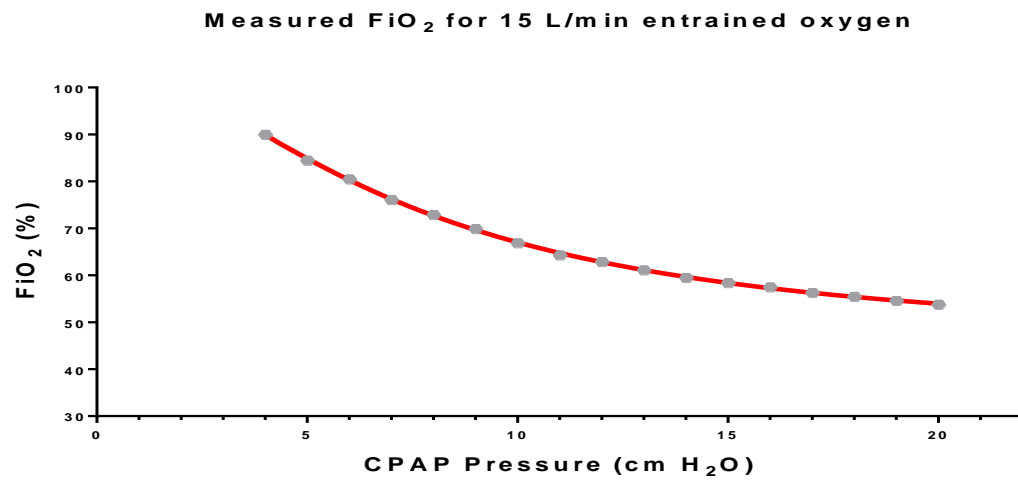

## S4

**Figure S4.** Bubble Plot depicting the relationship between (i) the number of inpatient admissions with COVID-19 (ii) the number of these patients who had a thoracic CT scan and (iii) the number of cases of pneumomediastinum detected.\*

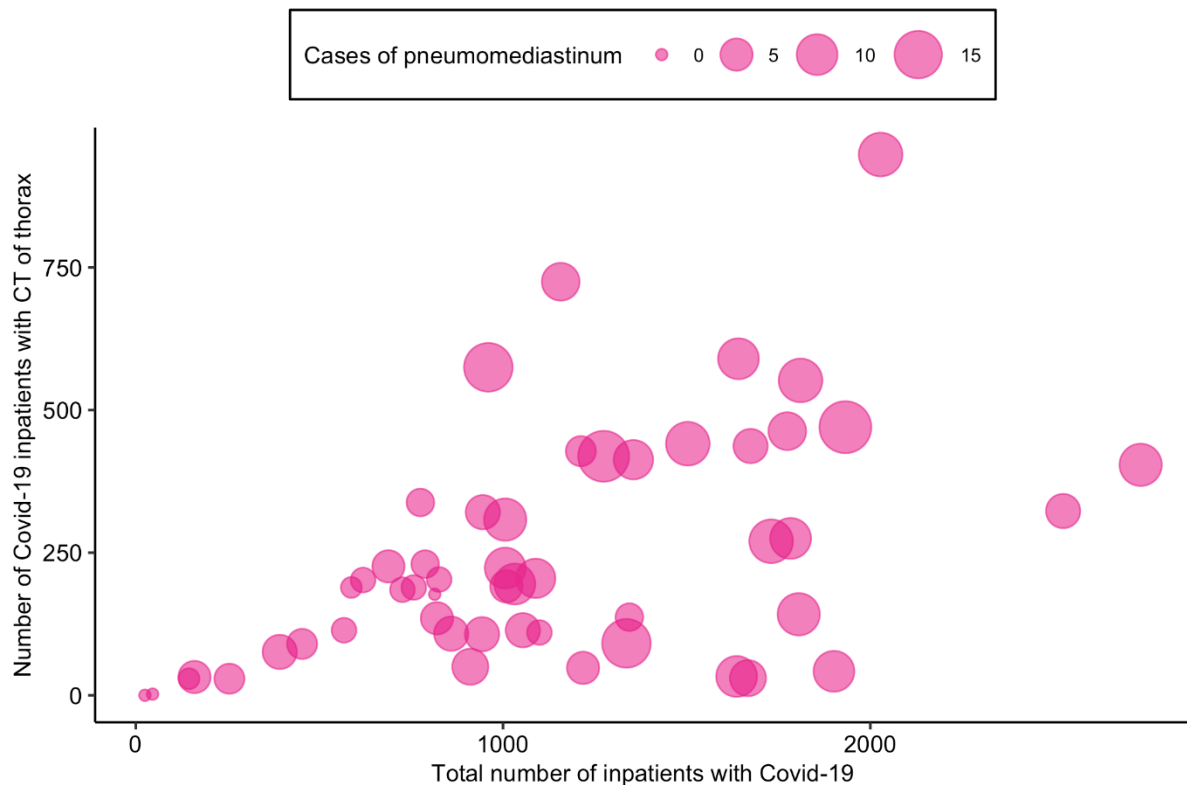

\*Results from the tertiary ECMO centre the Royal Brompton Hospital are not presented within Figure S4 given the highly selective patient intake. There were 17 cases of pneumomediastinum from 87 patients admitted to the Royal Brompton Hospital with COVID-19 of whom 67 had thoracic CT scans.

Three participating hospitals had no cases of pneumomediastinum but supplied incidence data and are included. There was a strong significant correlation between the number of COVID-19 inpatients and the number of cases identified  $r(50) = 0.61$   $p < .001$  and a strong correlation between the number of COVID-19 inpatients who had CT Thoraces performed and the number of cases identified  $r(50) = 0.49$   $p < .001$ . The number of COVID-19 inpatients having CT-scans is an inferior predictor of the number of pneumomediastinum cases than the total number of COVID-19 inpatients at a hospital (3-way ANOVA; COVID-19 inpatients  $t(50) = 3.885$   $p < .001$ ; CT-scans  $t(50) = 1.888$   $p < 0.65$ ).

We believe these results reflect the alternate indications for CT imaging in our COVID-19 inpatient cohort during this period which, were likely to assay for

thromboembolism and prognostication, not for pneumomediastinum. As illustrated above, there is wide variation in the amount of CT scanning in COVID-19 pneumonitis inpatients among our hospitals. This could reflect physician opinion on the utility of CT scanning in COVID-19 and possibly the varying availability of this resource at this time during the pandemic.

## S5

Figure S5. Bar chart illustrating the number and frequencies of intercostal chest drains employed according to whether pneumothoraces were unilateral or bilateral (n=154). Bilateral pneumothorax was ascribed to pneumothoraces occurring on both sides of the thorax within the same admission.

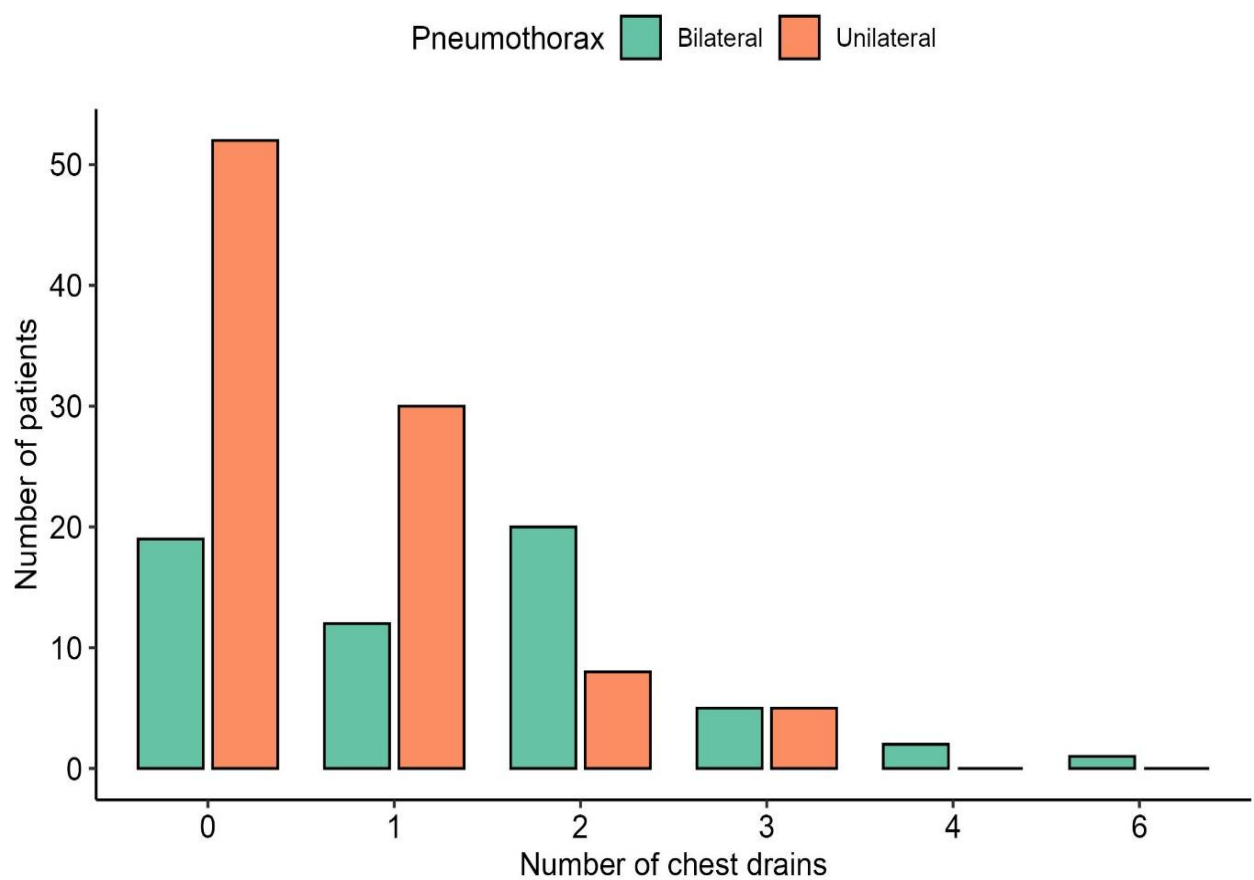

**S6**

**Table S6a.** Mortality data of patients deemed eligible for mechanical ventilation (whether mechanically ventilated or not), n = 315, Median Age = 58, (IQR 50 – 65)

|                                    | <b>Outcome 28 Days<br/>Number (%)</b> | <b>Outcome 120 Days<br/>Number (%)</b> |
|------------------------------------|---------------------------------------|----------------------------------------|
| <b>Dead</b>                        | 114 (36.2)                            | 156 (49.5)                             |
| <b>Discharged Home</b>             | 55 (17.5)                             | 136 (43.2)                             |
| <b>Discharged Rehab</b>            | 1 (0.3)                               | 16 (5.1)                               |
| <b>Still Inpatient</b>             | 145 (46.0)                            | 7 (0.2)                                |
|                                    | <b>Number of Patients (%)</b>         |                                        |
| <b>Received MV anytime</b>         | 241 (76.5)                            |                                        |
| <b>Received ECMO</b>               | 24 (10.0)                             |                                        |
|                                    | <b>Median and IQR (Days)</b>          |                                        |
| <b>Length of Admission</b>         | 26 (16 – 47)                          |                                        |
| <b>Duration of MV (dead)</b>       | 14 (9 – 22)                           |                                        |
| <b>Duration of MV (discharged)</b> | 24 (14 – 38)                          |                                        |

Table S6b. Mortality data for patients limited to CPAP support, n = 62, Median Age = 72, (IQR 61.8 – 79.3)

|                                   | <b>Outcome 28 Days<br/>Number (%)</b> |           | <b>Outcome 120 Days<br/>Number (%)</b> |        |
|-----------------------------------|---------------------------------------|-----------|----------------------------------------|--------|
| <b>Dead</b>                       | 32                                    | (51.6)    | 39                                     | (62.9) |
| <b>Discharged Home</b>            | 15                                    | (24.2)    | 23                                     | (37.1) |
| <b>Discharged Rehab</b>           | 0                                     |           | 0                                      |        |
| <b>Still Inpatient</b>            | 15                                    | (24.2)    | 0                                      |        |
| <b>Median Length of Admission</b> | 18                                    | (13 – 29) |                                        |        |

## **S7**

A binary logistic regression model of factors predictive of death at 120 days constructed for patients for full escalation *from the point of diagnosis of pneumomediastinum* is presented in Table 2 of the main manuscript. A similar model examining the predictive utility of variables *over the course of admission* is presented below. Presenting this model separately is done (i) to include *radiographic progression* in predictive modelling as this variable is not available at the point of diagnosis and (ii) to demonstrate the dominance of mechanical ventilation as a predictor of mortality when considered across patients' admissions.

**Table S7.** Binary Logistic Regression Model of factors most predictive of death at 120 days *over the course of admission* for patients eligible for mechanical ventilation (n=315). All variables significantly associated with mortality in univariate analyses were entered into the model stepwise, backwards. The model produces prediction accuracy for outcome of 75.2% versus a 51.1% default accuracy.

|                               | <b>B (SE)</b> | <b>Odds Ratio or % increase per unit with 95% CI</b> | <b>p</b> |
|-------------------------------|---------------|------------------------------------------------------|----------|
| <b>Mechanical ventilation</b> | 5.01 (1.03)   | 150.3 (20.1 - 1125.0)                                | < .001   |
| <b>Age</b>                    | -0.54 (0.14)  | 5.3 % per year (2.7 – 7.8)                           | < .001   |
| <b>Diabetes mellitus</b>      | 0.71 (0.38)   | 2.0 (1.0 – 4.3)                                      | 0.06     |

Variable entry into model stepwise backward. Model  $R^2 = 0.484$  Nagelkerke  $\chi^2 (4) = 142.1$   $p < .001$ . Constant  $B(SE) = 1.46 (0.88)$   
Variables in the regression model but not listed, Radiographic Progression ( $p = .103$ ). Variables not included in the model hypertension, IHD/LVSD and subcutaneous emphysema

## **S8**

62 patients whose treatment was limited to CPAP support were analyzed separately with respect to factors associated with outcome. The following four factors were associated with increased risk of death at 120 days in univariate analysis for this group: HFNO (OR in favor of death versus oxygen 22.2, 95% CI 1.2 – 408.1,  $p = .04$ ); CPAP (OR versus oxygen 4.2, 95% CI 1.0 – 17.7,  $p = .05$ ); IHD/LVSD (OR 9.8, 95% CI 1.2 – 81.2,  $p = 0.03$ ) and subcutaneous emphysema (OR 3.8, 95% CI 1.3 – 11.3,  $p = 0.02$ ). Notably, increasing age was *not* one of the variables associated with increased risk of death in this older subgroup. The four significantly associated variables in the univariate analyses (listed above) were entered into the regression model below.

**Table S8.** Binary Logistic Regression Model of factors most predictive of death at 120 days *over the course of admission* for patients whose treatment was limited to CPAP support. ( $n = 62$ ). This model produces prediction accuracy for outcome of 78.3% versus a 65.0% default accuracy.

|                               | <b>B (SE)</b> | <b>Odds Ratio or % increase per unit with 95% CI</b> | <b>p</b> |
|-------------------------------|---------------|------------------------------------------------------|----------|
| <b>Subcutaneous emphysema</b> | 1.66 (0.74)   | 5.2 (1.2 – 22.2)                                     | 0.03     |

Variable entry into model stepwise backward.  $R^2 = 0.533$  Nagelkerke. Model  $\chi^2(1) = 29.36$ ,  $p < .001$ . Constant  $B(SE) = -0.23$  (0.47) Variables in the regression but not listed CPAP ( $p = .09$ ). Variables not included in the model HFNO, IHD/LVSD.

## **S9**

Figures 9a and 9b. Axial and coronal slice of thoracic CT of a mechanically ventilated patient from the cohort with COVID-19 pneumonitis, pneumomediastinum and massive subcutaneous emphysema

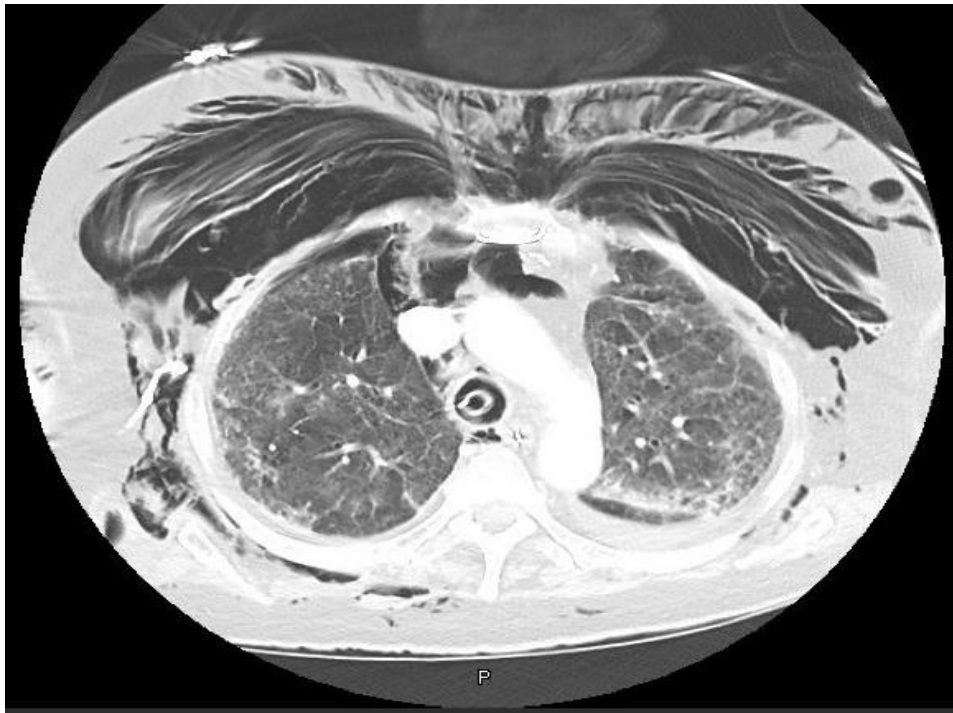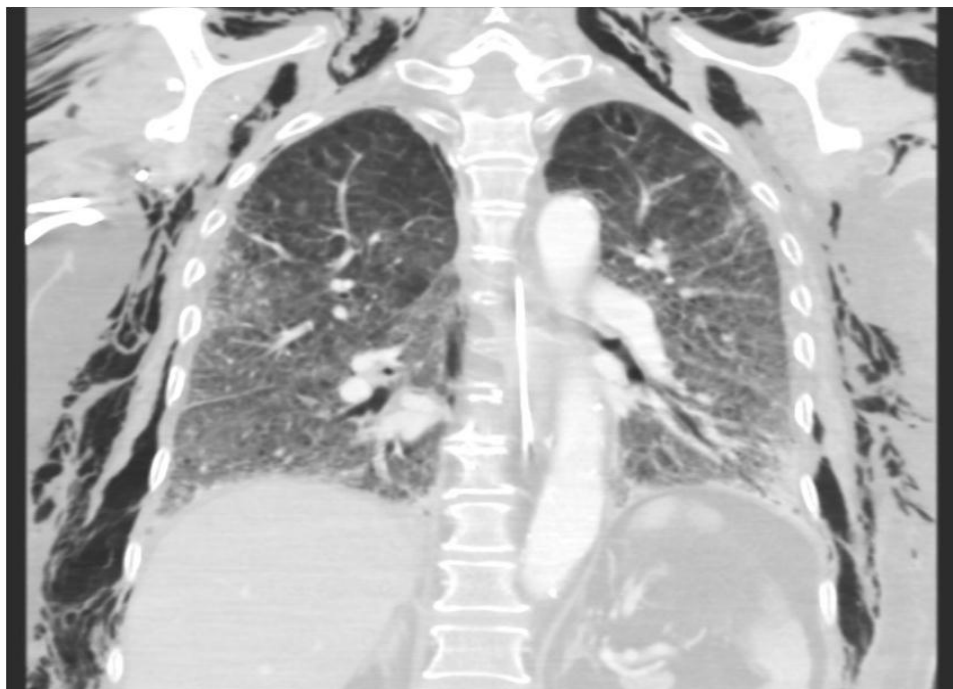

## References

1. McGuinness G, Zhan C, Rosenberg N, et al. Increased Incidence of Barotrauma in Patients with COVID-19 on Invasive Mechanical Ventilation. *Radiology* 2020;297:E252-E62.
2. Kangas-Dick A, Gazivoda V, Ibrahim M, et al. Clinical Characteristics and Outcome of Pneumomediastinum in Patients with COVID-19 Pneumonia. *J Laparoendosc Adv Surg Tech A* 2021;31:273-8.
3. Housman B, Jacobi A, Carollo A, et al. COVID-19 ventilator barotrauma management: less is more. *Ann Transl Med* 2020;8:1575.
4. Wong K, Kim DH, Iakovou A, et al. Pneumothorax in COVID-19 Acute Respiratory Distress Syndrome: Case Series. *Cureus* 2020;12:e11749.
5. Chopra A, Al-Tarbsheh AH, Shah NJ, et al. Pneumothorax in critically ill patients with COVID-19 infection: Incidence, clinical characteristics and outcomes in a case control multicenter study. *Respiratory Medicine* 2021;184.
6. Lemmers DHL, Abu Hilal M, Bnà C, et al. Pneumomediastinum and subcutaneous emphysema in COVID-19: barotrauma or lung frailty? *ERJ Open Res* 2020;6.
7. Rajdev K, Spanel AJ, McMillan S, et al. Pulmonary Barotrauma in COVID-19 Patients With ARDS on Invasive and Non-Invasive Positive Pressure Ventilation. *J Intensive Care Med* 2021;8850666211019719.
8. Brito J, Gregório P, Mariani A, et al. Pneumomediastinum in COVID-19 disease: Outcomes and relation to the Macklin effect. *Asian Cardiovasc Thorac Ann* 2021;29:541-8.
9. Martinelli AW, Ingle T, Newman J, et al. COVID-19 and pneumothorax: a multicentre retrospective case series. *Eur Respir J* 2020;56.
10. Belletti A, Palumbo D, Zangrillo A, et al. Predictors of Pneumothorax/Pneumomediastinum in Mechanically Ventilated COVID-19 Patients. *J Cardiothorac Vasc Anesth* 2021.
11. Cut TG, Tudoran C, Lazureanu VE, Marinescu AR, Dumache R, Tudoran M. Spontaneous Pneumomediastinum, Pneumothorax, Pneumopericardium and Subcutaneous Emphysema-Not So Uncommon Complications in Patients with COVID-19 Pulmonary Infection-A Series of Cases. *J Clin Med* 2021;10.
12. Edwards JA, Breitman I, Bienstock J, et al. Pulmonary barotrauma in mechanically ventilated coronavirus disease 2019 patients: A case series. *Ann Med Surg (Lond)* 2021;61:24-9.
13. Talan L, Şaşal Solmaz FG, Ercan U, et al. COVID-19 pneumonia and pneumothorax: case series. *Tuberk Toraks* 2020;68:437-43.
14. Udi J, Lang CN, Zotzmann V, et al. Incidence of Barotrauma in Patients With COVID-19 Pneumonia During Prolonged Invasive Mechanical Ventilation - A Case-Control Study. *J Intensive Care Med* 2021;36:477-83.
15. Eperjesiova B, Hart E, Shokr M, Sinha P, Ferguson GT. Spontaneous Pneumomediastinum/Pneumothorax in Patients With COVID-19. *Cureus* 2020;12:e8996.
16. Farias E, Rudski L, Zidulka A. Delivery of high inspired oxygen by face mask. *Journal of Critical Care* 1991;6:119-24.
17. Whittle JS, Pavlov I, Sacchetti AD, Atwood C, Rosenberg MS. Respiratory support for adult patients with COVID-19. *J Am Coll Emerg Physicians Open* 2020;1:95-101.

18. Groves N, Tobin A. High flow nasal oxygen generates positive airway pressure in adult volunteers. *Aust Crit Care* 2007;20:126-31.
19. Messer B, Tedd H, Doris T, Mountain A, Gatilogo C, Sovani M. The variation of FiO<sub>2</sub> with circuit type and peak inspiratory flow rate during non-invasive respiratory support using domiciliary ventilators and its significance during the COVID-19 pandemic. *Journal of the Intensive Care Society*;0:1751143720980280.
20. ARTP. ARTP Guidance for Oxygen Utilisation. Association of Respiratory Technology and Physiology 2020.
21. Brunson JC & Read QD (2020). "ggalluvial: Alluvial Plots in 'ggplot2'." R package version 0.12.3, <http://corybrunson.github.io/ggalluvial/>.
22. Larsson J (2021). eulerr: "Area-Proportional Euler and Venn Diagrams with Ellipses." R package version 6.1.1, <https://cran.r-project.org/package=eulerr>.
23. Wickham H, Averick M, Bryan J, Chang W, McGowan LD, François R, Grolemund G, Hayes A, Henry L, Hester J, Kuhn M, Pedersen TL, Miller E, Bache SM, Müller K, Ooms J, Robinson D, Seidel DP, Spinu V, Takahashi K, Vaughan D, Wilke C, Woo K, Yutani H. Welcome to the tidyverse. *Journal of Open Source Software* 2019;4:1686.
